# Supplementary material for: Non-Ionic Surfactant Recovery in Surfactant Enhancement Aquifer Remediation Effluent with Chlorobenzenes by Semivolatile Chlorinated Organic Compounds Volatilization
Source: MDPI journal article supplement (doi:10.3390/ijerph19127547), 2022-06-20
Supplement: s1 [file s1]

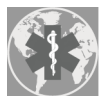

# Non-Ionic Surfactant Recovery in Surfactant Enhancement Aquifer Remediation Effluent with Chlorobenzenes by Semivolatile Chlorinated Organic Compounds Volatilization

Patricia Sáez <sup>1</sup>, Aurora Santos <sup>1</sup>, Raúl García-Cervilla <sup>1</sup>, Arturo Romero <sup>1</sup> and David Lorenzo <sup>1,\*</sup>

<sup>1</sup> Chemical Engineering and Materials Department, Complutense University of Madrid., Madrid 28040, Spain.

\* Correspondence: dlorenzo@quim.ucm.es

## SUPPLEMENTARY MATERIAL

**Table S1.** HS-GC conditions.

| Parameters                         | Conditions                                                            |
|------------------------------------|-----------------------------------------------------------------------|
| <i>Headspace</i>                   |                                                                       |
| Incubation Temperature (°C)        | 30, 40, 60                                                            |
| Incubation time (min)              | 60                                                                    |
| Syringe Temperature (°C)           | 90                                                                    |
| Agitator Speed (r.p.m.)            | 500                                                                   |
| <i>Gas Chromatograph</i>           |                                                                       |
| Carrier gas                        | Helium                                                                |
| Carrier gas pressure (kPa)         | 22.7                                                                  |
| Injector Temperature (°C)          | 180                                                                   |
| Injection Volume (mL)              | 2.5                                                                   |
| Split Ratio                        | 10:1                                                                  |
| Split Flow (mL·min <sup>-1</sup> ) | 50                                                                    |
| Temperature Program                | Initial Temperature 80 °C<br>Ramping to 80 °C at 180°C hold for 9 min |
| Detectors FID                      | Heater: 300°C                                                         |
|                                    | Air Flow: 300 mL/min                                                  |
|                                    | H <sub>2</sub> Fuel Flow: 40 mL/min                                   |
|                                    | Makeup Flow N <sub>2</sub> : 40 mL/min                                |
| Detectors ECD                      | Heater: 210°C                                                         |
|                                    | Makeup Flow N <sub>2</sub> : 40 mL/min                                |

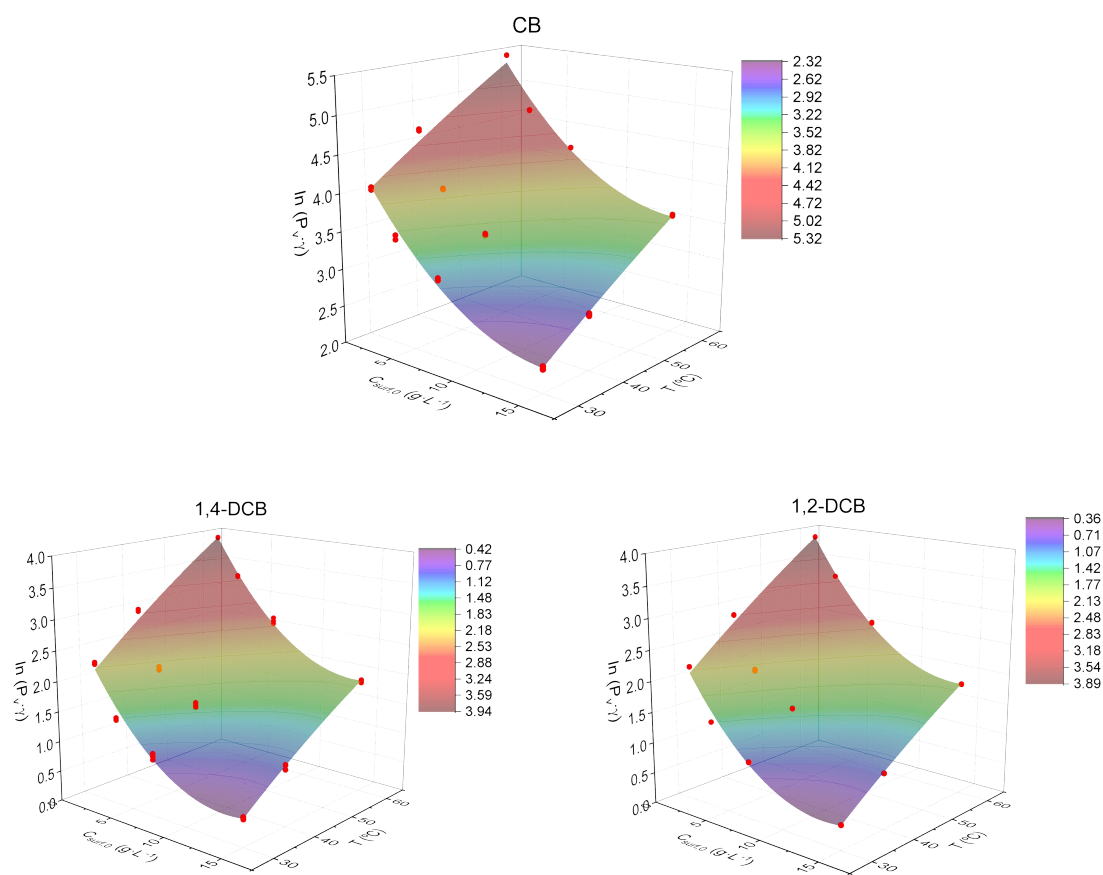

**Figure S1.** Values of  $P_{vj}^o$  for the experiments summarized in Table S1 (red points) and the response surfaces for the different compounds
